# Supplementary material for: The excellent peroxidase-like activity of uniform CuCo2O4 microspheres with oxygen vacancy for fast sensing of hydrogen peroxide and ascorbic acid
Source: Royal Society of Chemistry journal article supplement (doi:10.1039/d0nj05026a), 2020-12-15
Supplement: d0nj05026a1.pdf [file d0nj05026a1.pdf]

**The excellent peroxidase-like activity of uniform  $\text{CuCo}_2\text{O}_4$   
microspheres with oxygen vacancy for fast sensing of hydrogen  
peroxide and ascorbic acid**

**Shuai Han, Xiaohan Chen, Yifei Fan, Yuexing Zhang<sup>c</sup>, Zhongdong Yang<sup>a,\*</sup>, Xia  
Kong<sup>a,\*</sup>, Zhenxue Liu<sup>a</sup>, Qingyun Liu<sup>a,\*</sup> and Xianxi Zhang<sup>b</sup>**

**Synthesis of  $\text{CuCo}_2\text{O}_4$  microspheres**

Prior to the synthesis of  $\text{CuCo}_2\text{O}_4$  microspheres, 1 mmol  $\text{Co}(\text{NO}_3)_2$  and 1 mmol  $\text{Cu}(\text{NO}_3)_2$  were dissolved in 40 mL ethanol absolute to form a homogeneous solution. Then respectively, 0.5 g PVP and 0.6 g urea were added to the above solution, and some precipitation generated is clearly observed. After that, the solution containing the precipitation was transferred to a Teflon-lined stainless steel autoclave and reacted in oven at 130 °C for 5 h. After naturally cooling the autoclave to room temperature, the products (green precipitation) were separated by centrifugation. The precipitation was washed with ethanol and ultrapure water for several times and dried in a vacuum oven at 60 °C for 12 h. The  $\text{CuCo}_2\text{O}_4$  precursor (green powders) is successfully collected.

Then the obtained  $\text{CuCo}_2\text{O}_4$  precursor was evenly spread in porcelain combustion boat. Afterwards the precursor, in the porcelain combustion boat, was calcined at 400 °C for 2 h in air at heating rate of 2 °C•min<sup>-1</sup>. Finally, the  $\text{CuCo}_2\text{O}_4$  microspheres were collected for further experiments.

### **Assay of peroxidase-like activity of CuCo<sub>2</sub>O<sub>4</sub> microspheres**

The peroxidase mimetic activity of the CuCo<sub>2</sub>O<sub>4</sub> microspheres was assessed through an oxidation reaction of a chromogenic substrate (TMB) by H<sub>2</sub>O<sub>2</sub>. The steps of experiment were described as follows: firstly, adding 200 μL of 0.3 mg/mL CuCo<sub>2</sub>O<sub>4</sub> microspheres into a prepared cuvette consisting of 200 μL of TMB (1 mM) and 200 μL of H<sub>2</sub>O<sub>2</sub> (0.25 M) together with 1400 μL of phosphate buffer solution (PBS, pH = 5.0). Then, after three minutes of reaction, the reaction was monitored by a UV-1810 PC spectrophotometer. For the purpose of exploring the various response parameters' impacts towards the reaction, the influences of different reaction conditions including pH (2.0-8.0) and temperature (20-60 °C) on the peroxidase-like activity of CuCo<sub>2</sub>O<sub>4</sub> microspheres were investigated by the same experiment steps to obtain the optimum reaction conditions. Furthermore, the peroxidase-like activity of the different CuCo<sub>2</sub>O<sub>4</sub> microspheres systems was also explored under the same examination conditions.

The kinetic measurements of the catalytic reactions were conducted by recording absorption spectra at 3 min intervals at 652 nm under pH = 5.0 and temperature = 40 °C by changing the concentration of H<sub>2</sub>O<sub>2</sub> or TMB. On the basis of the

Lineweaver–Burk double reciprocal plot, according to  $\frac{1}{v} = \frac{K_m}{V_{max} \times [S]} + \frac{1}{V_{max}}$ , the Michaelis-Menten constant was obtained. In the above equation,  $v$  and  $V_{max}$  are the initial reaction velocity and the maximum reaction velocity, respectively.  $K_m$  is the Michaelis-Menten constant and  $[S]$  is the concentration of substrate.

### **Colorimetric assay of H<sub>2</sub>O<sub>2</sub> and ascorbic acid (AA)**

**H<sub>2</sub>O<sub>2</sub> determination:** 200  $\mu\text{L}$  of 0.2 mg/mL  $\text{CuCo}_2\text{O}_4$  microspheres was added into a prepared cuvette consisting of  $\text{H}_2\text{O}_2$  (200  $\mu\text{L}$ ) with different concentrations, 200  $\mu\text{L}$  of TMB (1 mM), and 1400  $\mu\text{L}$  of PBS (pH = 5.0). After reacting for three minutes, the standard curve of  $\text{H}_2\text{O}_2$  was obtained by recording absorbance of different  $\text{H}_2\text{O}_2$  concentrations at 652 nm.

**AA Determination:** A typical reaction system was constructed: 200  $\mu\text{L}$  of  $\text{CuCo}_2\text{O}_4$  (0.2 mg/mL), 1400  $\mu\text{L}$  of phosphate buffer solution (PBS, pH = 5), 200  $\mu\text{L}$  of TMB (1 mM) and 200  $\mu\text{L}$  of  $\text{H}_2\text{O}_2$  (0.25M), followed by the addition 200  $\mu\text{L}$  of variable concentrations of AA. The reaction system was monitored at 652 nm by a UV-1810 PC spectrophotometer after 3 min of reaction. The measurements follow the steps of  $\text{H}_2\text{O}_2$  colorimetric assay, changing only the concentration of additional AA.

#### **Computational theoretical simulative methods:**

Materials Visualizer was used for building structure models. The DMol3 package from Materials Studio was used for performing all the calculations. The Perdew–Burke–Ernzerh (PBE) functional of the generalized gradient approximation was selected for performing the unrestricted spin-polarized DFT calculations. The DND basis set (version 3.5) was used, and all the core electrons of Co and Cu were treated using the effective core potentials. The real space cutoff radius was set to 4.1 Å throughout the study. Further, the Brillouin zone was integrated using the Monkhorst–Pack scheme with a grid of  $3 \times 3 \times 1$ . The convergence criteria for structure optimization and energy calculation were set to (a) an SCF tolerance of  $1 \times 10^{-5}$  hartree, (b) an energy tolerance of  $2 \times 10^{-5}$  hartree, (c) a maximum force

tolerance of  $4 \times 10^{-3}$  hartree/Å; and (d) a maximum displacement tolerance of  $5 \times 10^{-3}$  Å. The bulk crystal of CuCo<sub>2</sub>O<sub>4</sub> hybrid was built by replacing two of the six Co atoms of the primitive cell of Co<sub>3</sub>O<sub>4</sub> crystal (F 41/D -3 2/M, a=b=c=8.086Å, a=b=g=90°) with Cu atom. After transferring back to conventional cell and cleaving the 220 surface of CuCo<sub>2</sub>O<sub>4</sub> hybrid, a vacuum zone with a thickness of 20 Å was added to eliminate any interactions between the adjacent slabs (named as CuCo<sub>2</sub>O<sub>4</sub>220). The adsorption energies (E<sub>ads</sub>) of H<sub>2</sub>O<sub>2</sub> on the surface are calculated from the relation  $E_{ads} = E(\text{molecule} + \text{surface}) - (E_{\text{molecule}} + E_{\text{surface}})$ , where E(molecule + surface), E<sub>molecule</sub>, and E<sub>surface</sub> represent the energies of H<sub>2</sub>O<sub>2</sub> on the CuCo<sub>2</sub>O<sub>4</sub>220, the isolated H<sub>2</sub>O<sub>2</sub> molecule, and the CuCo<sub>2</sub>O<sub>4</sub>220, respectively. For the adsorption of H<sub>2</sub>O<sub>2</sub> on the CuCo<sub>2</sub>O<sub>4</sub>220 surface with O vacancy, one O atom of CuCo<sub>2</sub>O<sub>4</sub>220 was deleted to model the O vacancy, resulting to CuCo<sub>2</sub>O<sub>4</sub>220-O.
